# Supplementary material for: Assessment of information as regards the toxicity of deoxynivalenol for horses and poultry
Source: PubMed Central journal article supplement (PMC9892893; doi:10.2903/j.efsa.2023.7806), 2023-02-02
Supplement: EFS2-21-e07806-s001.pdf [file EFS2-21-e07806-s001.pdf]

1 Annex to:

2 EFSA Panel on Contaminants in the Food Chain (CONTAM), Dieter Schrenk, Margherita Bignami, Laurent  
3 Bodin, James Kevin Chipman, Jesús del Mazo, Bettina Grasl-Kraupp, Christer Hogstrand, Jean-Charles  
4 Leblanc, Elsa Nielsen, Evangelia Ntzani, Annette Petersen, Salomon Sand, Tanja Schwerdtle, Christiane  
5 Vlemminckx, Heather Wallace, Sven Daenicke, Carlo Stefano Nebbia, Isabelle P Oswald, Elena Rovesti,  
6 Hans Steinkellner and Laurentius (Ron) Hoogenboom, 2022 Scientific Opinion on the assessment of  
7 information as regards the toxicity of xxxxxxxxxxxxxxxxxxxx. *EFSA Journal* 2022; xxxxxx, xxxxxx pp. doi:  
8 [10.2903/j.efsa.2022.xxxxxx](https://doi.org/10.2903/j.efsa.2022.xxxxxx)

9 © 2022 European Food Safety Authority. EFSA Journal published by John Wiley and Sons Ltd on  
10 behalf of European Food Safety Authority.

11

## **ANNEX A - Protocol for the information assessment for animal health related to the presence of Mycotoxins in feed - deoxynivalenol**

12 The current protocol, or strategy, reports on the problem formulation and approach selected by the  
13 Panel on Contaminants in the Food Chain (CONTAM Panel) to perform an assessment of information as  
14 regards the toxicity of deoxynivalenol for horses and poultry other than laying hens and, if necessary,  
15 to update the scientific opinion on the risks to human and animal health related to the presence of  
16 deoxynivalenol and its acetylated and modified forms in food and feed.

17 The protocol is in accordance with the draft framework for protocol development for EFSA's scientific  
18 assessments (EFSA, 2020). This framework foresees that the extent of planning in the protocol (i.e.  
19 the degree of detail provided in the protocol for the methods that will be applied in the assessment)  
20 can be tailored to accommodate the characteristics of the mandate. Considering the timelines and the  
21 available resources, the CONTAM Panel applied a low level of planning (EFSA, 2020).

22 Should the need to amend the protocol emerge as the assessment proceeds, such amendments will be  
23 documented and justified.

### **A.1. Problem formulation**

#### **Objectives of the assessments**

26 The CONTAM Panel published an Opinion on the risk assessment of deoxynivalenol (DON) in food and  
27 feed in 2017 (EFSA CONTAM Panel, 2017).

28 The objectives of the current assessment are to consider the additional information and comments  
29 submitted to the European Commission to assess the risk for toxicity in horses and poultry other than  
30 laying hens and, if necessary, update EFSA's previous scientific opinion on the risks to human and  
31 animal health related to the presence of DON in food and feed.

32 In case the CONTAM Panel decided to modify the reference points for DON in horses and poultry other  
33 than laying hens, the risks will be assessed against the animal dietary exposure assessment included  
34 in the previous EFSA opinion (EFSA CONTAM Panel, 2017).

#### **Target populations**

36 The target populations of the animal risk assessment for DON, are horses and poultry other than laying  
37 hens.

#### **Adverse effects and endpoints**

39 The animal risk assessment will address the adverse health effects associated with the exposure to  
40 DON in feed, as identified in the hazard identification step performed in the 2017 opinion.

41 Further considerations will be made by the WG during the assessment to re-evaluate existing and new  
 42 evidence and take other adverse effects into account for the animal species under consideration.

43

#### 44 **Identification of the assessment sub-questions**

45 A series of sub-questions to be taken into account will be answered and combined for performing the  
 46 risk assessment. The sub-questions identified are reported in **Table A.1.2**.

47 For the **assessment**, studies in the target species will be used for the hazard identification and  
 48 characterisation.

49 The specific studies which have been provided by the Commission as potentially generating a lower  
 50 point of departure will be considered in the assessment. The studies are summarized in **Table A.2.1**.

51 The potential association between the target compound(s) and the endpoints of interest will be  
 52 evaluated for each animal species of interest.

53 **Table A.1.2.** Sub-questions to be answered for the risk assessment

| Risk assessment step    | No | Sub-questions                                                                                               |
|-------------------------|----|-------------------------------------------------------------------------------------------------------------|
| Hazard identification   | 1  | What adverse outcomes are caused by exposure to DON in horses/poultry other than laying hens                |
| Hazard characterisation | 2  | What are the dose-response relationships between DON and relevant endpoints in the respective farm animals? |

#### 54 **A.2. Method for answering the sub-questions**

55 The sub-questions formulated in Table A.1.2 will be answered by a narrative approach. The research  
 56 studies taken into account will be limited to those referred to by the Commission to inform an  
 57 assessment to potentially derived a lower reference point for adverse effect on animal health, compared  
 58 to the previous EFSA opinion (EFSA CONTAM Panel, 2017), but not be limited to these should other  
 59 studies previously considered (or not) by the CONTAM Panel be deemed relevant.

60 The Working Group decided to perform a literature search to obtain further evidence to answer the  
 61 formulated sub-questions, covering the period from 01/01/2017 until 01/02/2022 for the three animal  
 62 species.

63 **Table A.2.1** Selection of research studies to be (re)assessed

|                                           |                                                                                                                                                                                                                   |
|-------------------------------------------|-------------------------------------------------------------------------------------------------------------------------------------------------------------------------------------------------------------------|
| DON and its acetylated and modified forms | <u>Poultry</u><br>Antonissen et al. 2014.<br>Yunus et al., 2012a<br>Yunus et al., 2012b<br><br><u>Horses</u><br>Johnson et al., 1997<br>Khol-Parisini et al. 2012<br>Raymond et al., 2003<br>Raymond et al., 2005 |
|-------------------------------------------|-------------------------------------------------------------------------------------------------------------------------------------------------------------------------------------------------------------------|

64 The research studies on farm animals submitted for the assessment and those identified in the  
 65 additional literature search will be considered for the hazard identification and characterisation. If  
 66 possible, on the basis of the available evidence, a Reference Point (RP) will be derived for each animal

67 species of interest, together with an evaluation of possible uncertainties, which will be assessed in line  
68 with the guidance on communication of uncertainty in scientific assessments (EFSA, 2019).

69 **A.3. Plans for updating the literature searches and dealing with newly**  
70 **available evidence**

71 Given the limited nature of the opinion, aimed to assess submitted information rather than performing  
72 a comprehensive risk assessment, the WG does not foresee the need to perform repeated literature  
73 searches.

74 **A.4. Public consultation**

75 n/a

76 **A.5. History of the amendments to the protocol**

77 n/a

78

79

## 80 References

- 81
- 82 Antonissen G. et al 2014. The mycotoxin deoxynivalenol predisposes for the development of *Clostridium*
- 83 *perfringens*-induced necrotic enteritis in broiler chickens. *Plos One*, 9(9):e108775.
- 84 EFSA (European Food Safety Authority), 2007. Guidance of the Scientific Committee on a request from
- 85 EFSA related to Uncertainties in Dietary Exposure Assessment. *EFSA Journal* 2007;5(1):438, 54
- 86 pp. <https://doi.org/10.2903/j.efsa.2007.438>
- 87 EFSA (European Food Safety Authority), 2009. Guidance of the Scientific Committee on transparency
- 88 in the scientific aspects of risk assessments carried out by EFSA. Part 2: General principles. *EFSA*
- 89 *Journal* 2009;7(6):1051, 22 pp. <https://doi.org/10.2903/j.efsa.2009.1051>
- 90 EFSA (European Food Safety Authority), 2010a. Management of left-censored data in dietary exposure
- 91 assessment of chemical substances. *EFSA Journal* 2010;8(3):1557, 96 pp.
- 92 <https://doi.org/10.2903/j.efsa.2010.1557>
- 93 EFSA (European Food Safety Authority), 2010b. Standard sample description for food and feed. *EFSA*
- 94 *Journal* 2010, 8(1):1457, 54 pp. <https://doi.org/10.2903/j.efsa.2010.1457>
- 95 EFSA (European Food Safety Authority), 2011a. Use of the EFSA Comprehensive European Food
- 96 Consumption Database in Exposure Assessment. *EFSA Journal* 2011;9(3):2097, 34 pp.
- 97 <https://doi.org/10.2903/j.efsa.2011.2097>
- 98 EFSA (European Food Safety Authority), 2011b. Overview of the procedures currently used at EFSA for
- 99 the assessment of dietary exposure to different chemical substances. *EFSA Journal*
- 100 *Journal* 2011;9(12):2490, 33 pp. <https://doi.org/10.2903/j.efsa.2011.2490>
- 101 EFSA (European Food Safety Authority), 2011c. Evaluation of the FoodEx, the food classification system
- 102 applied to the development of the EFSA Comprehensive European Food Consumption Database.
- 103 *EFSA Journal* 2011;9(3):1970, 27 pp. <https://doi.org/10.2903/j.efsa.2011.1970>
- 104 EFSA (European Food Safety Authority), Hart A, Maxim L, Siegrist M, Von Goetz N, da Cruz C, Merten
- 105 C, Mosbach-Schulz O, Lahaniatis M, Smith A and Hardy A, 2019. Guidance on Communication of
- 106 Uncertainty in Scientific Assessments. *EFSA Journal* 2019;17(1):5520, 73 pp.
- 107 <https://doi.org/10.2903/j.efsa.2019.5520>
- 108 EFSA (European Food Safety Authority), Martino L, Aiassa E, Halldórsson TI, Koutsoumanis PK; Naegeli
- 109 H, Baert K, Baldinelli F, Devos Y, Lodi F, Lostia A, Manini P, Merten C, Messens W, Rizzi V,
- 110 Tarazona J, Titz A, Vos S, 2020. Draft framework for protocol development for EFSA's scientific
- 111 assessments. EFSA supporting publication 2020:EN-1843, 46 pp.
- 112 <https://doi.org/10.2903/sp.efsa.2020.EN-1843>
- 113 EFSA CONTAM Panel (EFSA Panel on Contaminants in the Food Chain), 2014. Scientific Opinion on the
- 114 risks for human and animal health related to the presence of modified forms of certain mycotoxins
- 115 in food and feed. *EFSA Journal* 2014;12(12):3916, 107 pp. doi:10.2903/j.efsa.2014.3916
- 116 EFSA CONTAM Panel (EFSA Panel on Contaminants in the Food Chain), Knutsen HK, Alexander J,
- 117 Barregard L, Bignami M, Bruschweiler B, Ceccatelli S, Cottrill B, Dinovi M, Grasl-Kraupp B,
- 118 Hogstrand C, Hoogenboom LR, Nebbia CS, Oswald IP, Petersen A, Rose M, Roudot A-C,
- 119 Schwerdtle T, Vleminckx C, Vollmer G, Wallace H, De Saeger S, Eriksen GS, Farmer P, Freymy J-
- 120 M, Gong YY, Meyer K, Naegeli H, Parent-Massin D, Rietjens I, van Egmond H, Altieri A, Eskola
- 121 M, Gergelova P, Ramos Bordajandi L, Benkova B, Dorr B, Gkrillas A, Gustavsson N, van Manen
- 122 M and Edler L, 2017. Scientific Opinion on the risks to human and animal health related to the
- 123 presence of deoxynivalenol and its acetylated and modified forms in food and feed. *EFSA Journal*
- 124 *Journal* 2017;15(9):4718, 345 pp. <https://doi.org/10.2903/j.efsa.2017.4718>
- 125 EFSA Scientific Committee, 2011. Scientific Opinion on genotoxicity testing strategies applicable to food
- 126 and feed safety assessment. *EFSA Journal* 2011;9(9):2379, 69 pp.
- 127 <https://doi.org/10.2903/j.efsa.2011.2379>

- 128 EFSA Scientific Committee, 2012a. EFSA Scientific Committee; Guidance on selected default values to  
129 be used by the EFSA Scientific Committee, Scientific Panels and Units in the absence of actual  
130 measured data. EFSA Journal 2012;10(3):2579, 32 pp. <https://doi.org/10.2903/j.efsa.2012.2579>
- 131 EFSA Scientific Committee, 2012b. Scientific Opinion on Risk Assessment Terminology. EFSA Journal  
132 2012;10(5):2664, 43 pp. <https://doi.org/10.2903/j.efsa.2012.2664>
- 133 EFSA Scientific Committee, Benford D, Halldorsson T, Jeger MJ, Knutsen HK, More S, Naegeli H,  
134 Noteborn H, Ockleford C, Ricci A, Rychen G, Schlatter JR, Silano V, Solecki R, Turck D, Younes  
135 M, Craig P, Hart A, Von Goetz N, Koutsoumanis K, Mortensen A, Ossendorp B, Martino L, Merten  
136 C, Mosbach-Schulz O and Hardy A, 2018. Guidance on Uncertainty Analysis in Scientific  
137 Assessments. EFSA Journal 2018;16(1):5123, 39 pp. <https://doi.org/10.2903/j.efsa.2018.5123>
- 138 EFSA Scientific Committee, Hardy A, Benford D, Halldorsson T, Jeger MJ, Knutsen KH, More S,  
139 Mortensen A, Naegeli H, Noteborn H, Ockleford C, Ricci A, Rychen G, Silano V, Solecki R, Turck  
140 D, Aerts M, Bodin L, Davis A, Edler L, Gundert-Remy U, Sand S, Slob W, Bottex B, Abrahantes  
141 JC, Marques DC, Kass G and Schlatter JR, 2017a. Update: Guidance on the use of the benchmark  
142 dose approach in risk assessment. EFSA Journal 2017;15(1):4658, 41 pp.  
143 <https://doi.org/10.2903/j.efsa.2017.4658>
- 144 EFSA Scientific Committee, Hardy A, Benford D, Halldorsson T, Jeger MJ, Knutsen HK, More S, Naegeli  
145 H, Noteborn H, Ockleford C, Ricci A, Rychen G, Schlatter JR, Silano V, Solecki R, Turck D,  
146 Benfenati E, Chaudhry QM, Craig P, Frampton G, Greiner M, Hart A, Hogstrand C, Lambre C,  
147 Luttk R, Makowski D, Siani A, Wahlström H, Aguilera J, Dorne J-L, Fernandez Dumont A, Hempen  
148 M, Valtueña Martínez S, Martino L, Smeraldi C, Terron A, Georgiadis N and Younes M, 2017b.  
149 Scientific Opinion on the guidance on the use of the weight of evidence approach in scientific  
150 assessments. EFSA Journal 2017;15(8):4971, 69 pp. <https://doi.org/10.2903/j.efsa.2017.4971>
- 151 EFSA Scientific Committee, Hardy A, Benford D, Halldorsson T, Jeger MJ, Knutsen HK, More S, Naegeli  
152 H, Noteborn H, Ockleford C, Ricci A, Rychen G, Schlatter JR, Silano V, Solecki R, Turck D, Younes  
153 M, Bresson J-L, Griffin J, Hougaard Benekou S, van Loveren H, Luttk R, Messean A, Penninks A,  
154 Ru G, Stegeman JA, van der Werf W, Westendorf J, Woutersen RA, Barizzone F, Bottex B, Lanzoni  
155 A, Georgiadis N and Alexander J, 2017c. Guidance on the assessment of the biological relevance  
156 of data in scientific assessments. EFSA Journal 2017;15(8):4970, 73 pp.  
157 <https://doi.org/10.2903/j.efsa.2017.4970>
- 158 EFSA Scientific Committee, More SJ, Bampidis V, Benford D, Bennekou SH, Bragard C, Halldorsson TI,  
159 Hernandez-Jerez AF, Koutsoumanis K, Naegeli H, Schlatter JR, Silano V, Nielsen SS, Schrenk D,  
160 Turck D, Younes M, Benfenati E, Castle L, Cedergreen N, Hardy A, Laskowski R, Leblanc JC,  
161 Kortenkamp A, Ragas A, Posthuma L, Svendsen C, Solecki R, Testai E, Dujardin B, Kass GEN,  
162 Manini P, Jeddi MZ, Dorne J-LCM and Hogstrand C, 2019. Guidance on harmonised  
163 methodologies for human health, animal health and ecological risk assessment of combined  
164 exposure to multiple chemicals. EFSA Journal 2019;17(3):5634, 77 pp.  
165 <https://doi.org/10.2903/j.efsa.2019.5634>
- 166 Johnson PJ, Casteel SW and Messer NT, 1997. Effect of feeding deoxynivalenol (vomitoxin)-  
167 contaminated barley to horses. Journal of Veterinary Diagnostic Investigation, 9, 219–221.
- 168 Khol-Parisini A, Hellweg P, Razzazi-Fazeli E, Saalmuller Strasser A, Tichy A and Zentek J, 2012. Highly  
169 deoxynivalenol contaminated oats and immune function in horses. Archives of Animal Nutrition,  
170 66, 149–161.
- 171 Raymond SL, Smith TK and Swamy HVLN, 2003. Effects of feeding a blend of grains naturally  
172 contaminated with Fusarium mycotoxins on feed intake, serum chemistry and haematology of  
173 horses and the efficacy of a polymeric glucomannan mycotoxin adsorbent. Journal of Animal  
174 Science, 81, 2123–2130.
- 175 Raymond SL, Smith TK and Swamy HVLN, 2005. Effects of feeding a blend of grains naturally  
176 contaminated with Fusarium mycotoxins on feed intake, metabolism, and indices of athletic  
177 performance of exercised horses. Journal of Animal Science, 83, 1267–1273.

- 178 WHO/IPCS (World Health Organization/International Programme on Chemical Safety), 2008.  
179 Uncertainty and data quality in exposure assessment. Available online:  
180 <http://www.who.int/iris/handle/10665/44017>
- 181 WHO/IPCS (World Health Organization/International Programme on Chemical Safety), 2009. Principles  
182 and Methods for the Risk Assessment of Chemicals in Food, International Programme on  
183 Chemical Safety, Environmental Health Criteria 240. Chapter 6: Dietary Exposure Assessment of  
184 Chemicals in Food. Available online: <http://www.who.int/ipcs/food/principles/en/index1.html>
- 185 Yunus AW, Błajet-Kosicka A, Kosicki R, Khan MZ, Rehman H and Bohm J, 2012b. Deoxynivalenol as a  
186 contaminant of broiler feed: intestinal development, absorptive functionality, and metabolism of  
187 the mycotoxin. Poultry Science, 91, 852–861.
- 188 Yunus AW, Ghareeb K, Twaruzek M, Grajewski J and Bohm J, 2012a. Deoxynivalenol as a contaminant  
189 of broiler feed: Effects on bird performance and response to common vaccines. Poultry Science,  
190 91, 844–851.
- 191  
192  
193  
194
